# Supplementary material
Source: PubMed Central journal article supplement (PMC8277531)
Supplement: NIHMS1707145-supplement-8.pdf [file NIHMS1707145-supplement-8.pdf]

|                                                     | cScap/4G10 <sup>Fab</sup> | cScap <sup>D435V</sup> /cInsig-1/4G10 <sup>Fab</sup> |
|-----------------------------------------------------|---------------------------|------------------------------------------------------|
| <b>Data collection and processing</b>               |                           |                                                      |
| Magnification                                       | 46,296                    | 46,296                                               |
| Voltage (kV)                                        | 300                       | 300                                                  |
| Electron exposure (e <sup>-</sup> /Å <sup>2</sup> ) | 60                        | 60                                                   |
| Defocus range (μm)                                  | 1.6 – 2.6                 | 1.6 – 2.6                                            |
| Pixel size (Å)                                      | 1.08                      | 1.08                                                 |
| Symmetry imposed                                    | C1                        | C1                                                   |
| Initial particle images (no.)                       | 9,052,025                 | 11,542,708                                           |
| Final particle images (no.)                         |                           |                                                      |
| Global map                                          | 223,673                   | 155,187                                              |
| L1-L7/4G10 <sup>Fab</sup>                           | 223,673                   | 155,187                                              |
| Global w/ordered TMs                                | 20,931                    | 80,678                                               |
| Map resolution (Å)                                  | 2.9 – 4.1                 | 3.5 – 4.6                                            |
| FSC threshold                                       | 0.143                     | 0.143                                                |
| <b>Refinement</b>                                   |                           |                                                      |
|                                                     | L1-L7/4G10 <sup>Fab</sup> | L1-L7/4G10 <sup>Fab</sup>                            |
| Model composition                                   |                           |                                                      |
| Non-hydrogen atoms                                  | 4138                      | 4178                                                 |
| Protein residues                                    | 511                       | 516                                                  |
| Ligands                                             | 2                         | 2                                                    |
| R.m.s. deviations                                   |                           |                                                      |
| Bond lengths (Å)                                    | 0.004                     | 0.006                                                |
| Bond angles (°)                                     | 0.653                     | 0.940                                                |
| Validation                                          |                           |                                                      |
| MolProbity score                                    | 1.60                      | 1.84                                                 |
| Clashscore                                          | 5.26                      | 8.59                                                 |
| Poor rotamers (%)                                   | 0.00                      | 0.00                                                 |
| Ramachandran plot                                   |                           |                                                      |
| Favored (%)                                         | 95.39                     | 94.47                                                |
| Allowed (%)                                         | 4.61                      | 5.53                                                 |
| Disallowed (%)                                      | 0.00                      | 0.00                                                 |

**Table S1. CryoEM Data Collection and Refinement Statistics, Related to Figures 2 and 4**

| <b>Location in Scap</b> | <b>Ortholog residue in chicken Scap</b> | <b>Mutation in hamster Scap</b> | <b>Effect on SREBP2 transport</b> | <b>Reference</b>      |
|-------------------------|-----------------------------------------|---------------------------------|-----------------------------------|-----------------------|
| <b>TM2</b>              | Y298                                    | Y298C                           | Constitutive                      | Nohturfft et al. 1998 |
| <b>TM3</b>              | L315                                    | L315F                           | Constitutive                      | Yabe et al. 2002      |
| <b>TM4</b>              | D450                                    | D443N                           | Constitutive                      | Hua et al. 1996       |
| <b>TM4</b>              | D435                                    | D428A                           | No transport                      | Feramisco et al. 2005 |

**Table S2. Mutations in Scap that Affect Function, Related to Figure 5**

Key functional residues in chicken Scap and hamster Scap described in this paper. Introducing the Y298C, L315F, or D443N mutations into hamster Scap results in a Scap that does not bind Insigs and whose transport of SREBP2 is not inhibited by sterols. In contrast, mutating hamster Scap D428 to alanine or chicken Scap D435 to valine results in a Scap that does not transport SREBP2 and that binds to Insigs irrespective of sterol levels.

| <b>Location in Insig</b> | <b>Ortholog residue in chicken Insig-1</b> | <b>Mutation in human Insig-2</b> | <b>Effect of mutation on 25HC binding</b> | <b>Reference</b>          |
|--------------------------|--------------------------------------------|----------------------------------|-------------------------------------------|---------------------------|
| <b>TM1</b>               | G70                                        | G39F                             | Reduced                                   | Ren et al. 2015           |
| <b>TM2</b>               | C108                                       | C77D                             | Reduced                                   | Ren et al. 2015           |
| <b>TM2</b>               | A144                                       | A113W                            | Not tested                                | Ren et al. 2015           |
|                          | F146                                       | F115A                            | Reduced                                   | Radhakrishnan et al. 2007 |
|                          | G148                                       | G117F                            | Not tested                                | Ren et al. 2015           |
|                          | H151                                       | H120F                            | Not tested                                | Ren et al. 2015           |
| <b>TM4</b>               | Q163                                       | Q132A                            | None                                      | Radhakrishnan et al. 2007 |
|                          | T167                                       | T136A                            | Reduced                                   | Radhakrishnan et al. 2007 |
|                          | W176                                       | W145A                            | None                                      | Radhakrishnan et al. 2007 |
|                          | D180                                       | D149A                            | None                                      | Radhakrishnan et al. 2007 |
| <b>TM6</b>               | G231                                       | G200F                            | Reduced                                   | Ren et al. 2015           |

**Table S3. Mutations in Insig that Affect Function, Related to Figure 5**

Key functional residues in chicken Insig-1 and human Insig-2 described in this paper. Introduction of each of the indicated mutations into human Insig-2 results in a protein that cannot bind to Scap. However, these mutations have variable results on binding of Insig-2 to 25-HC, as indicated.

| Primers for PCR amplification of antibody regions |                                |             |
|---------------------------------------------------|--------------------------------|-------------|
| mFG_1                                             | AGGAACTGCAGGTGTCC              | IgG Forward |
| mFG_2                                             | CAGCTACAGGTGTCCACTCC           | IgG Forward |
| mFG_3                                             | TGGCAGCARCAGCTACAGG            | IgG Forward |
| mFG_4                                             | CTGCCTGGTGACATTCCCA            | IgG Forward |
| mFG_5                                             | CCAAGCTGTGTCCTGTC              | IgG Forward |
| mFG_6                                             | TTTTAAAAGGTGTCCAGKGT           | IgG Forward |
| mFG_7                                             | CCTGTCAGTAACTRCAGGTGTCC        | IgG Forward |
| mFG_8                                             | TTTTAAAAGGGGTCCAGTGT           | IgG Forward |
| mFG_9                                             | CGTTCCTGGTATCCTGTCT            | IgG Forward |
| mFG_10                                            | ATGAAGTTGTGGYTRAACTGG          | IgG Forward |
| mFG_11                                            | TGTTGGGGCTKAAGTGGG             | IgG Forward |
| mRG*                                              | AGAAGGTGTGCACACCGCTGGAC        | IgG Reverse |
| mFK_1                                             | RGTGCAGATTTTCAGCTTCTGCT        | IgK Forward |
| mFK_2                                             | TGGACATGAGGGCYCCTGCTCAGT       | IgK Forward |
| mFK_3                                             | CTSTGGTTGTCTGGTGTGAYGGA        | IgK Forward |
| mFK_4                                             | GTTGCTGCTGCTGTGGCTTACA         | IgK Forward |
| mFK_5                                             | GTATCTGGTACCTGTGG              | IgK Forward |
| mFK_6                                             | TGCTTTTCTGGATTTTCAGCCTCCAG     | IgK Forward |
| mFK_7                                             | TCAACTTCTGCTCTTCTGCTGTTT       | IgK Forward |
| mFK_8                                             | CTAGCTCYTCTCCTCAGYCTTCTTCTCCTC | IgK Forward |
| mFK_9                                             | GTGMTGGTGCTBRTGGG              | IgK Forward |
| mFK_10                                            | STGYTGHTGYTCTGG                | IgK Forward |
| mRK*                                              | ACTGAGGCACCTCCAGATGTT          | IgK Reverse |

**Table S4. Primers for Sequencing 4G10<sup>Fab</sup>, related to STAR Methods**
