# Supplementary material
Source: PubMed Central journal article supplement (PMC8277531)

**A**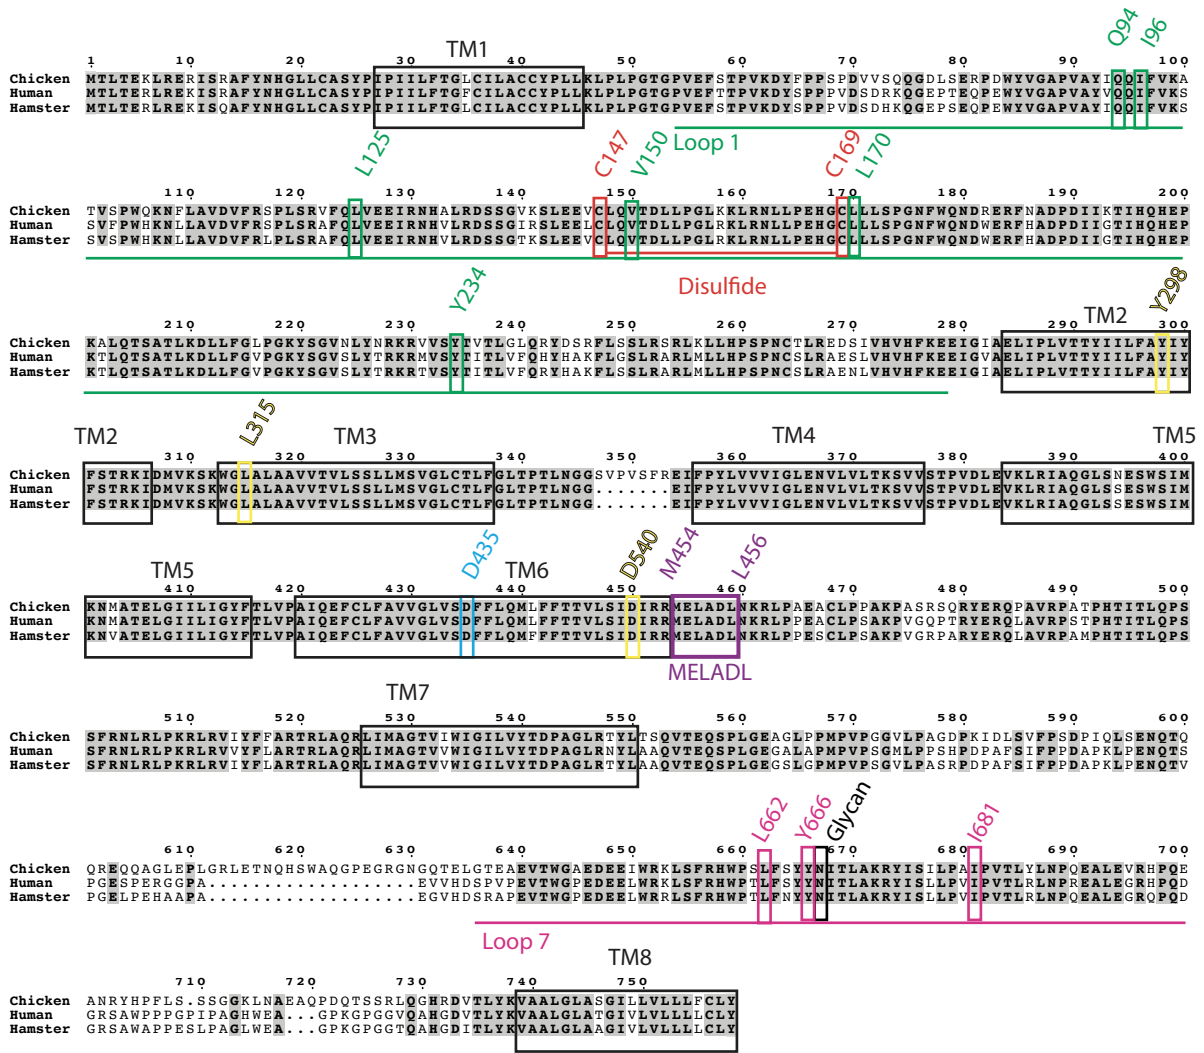**B**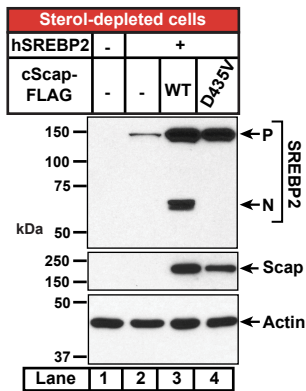**C**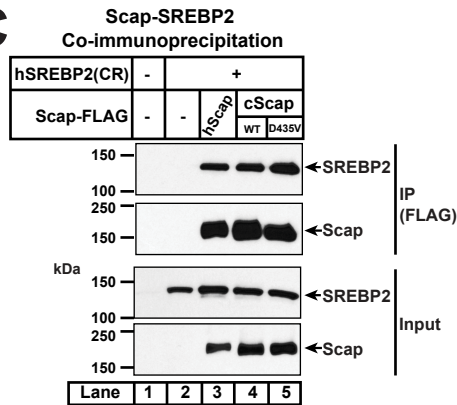**D**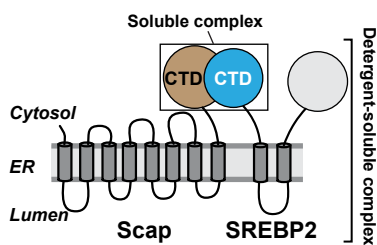**E**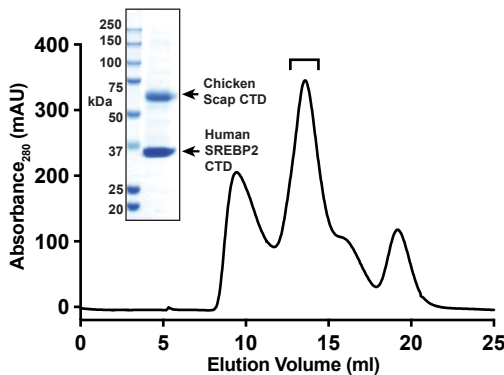**F**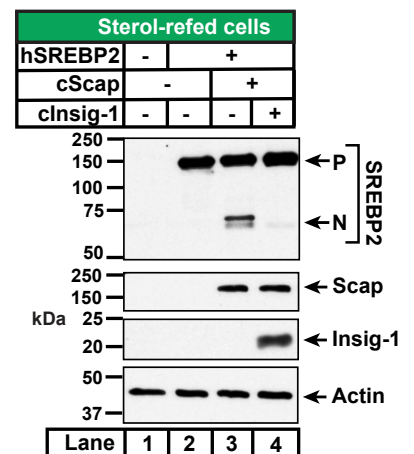

Supplement: NIHMS1707145-supplement-1.pdf [file NIHMS1707145-supplement-1.pdf]

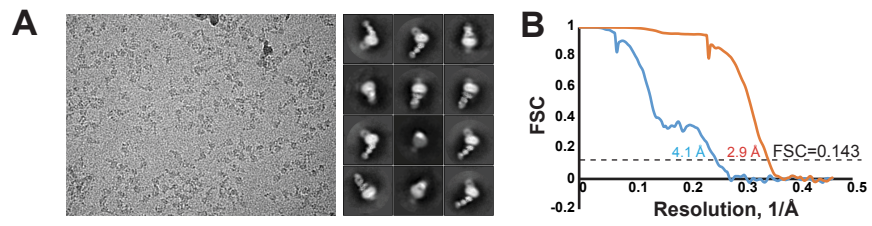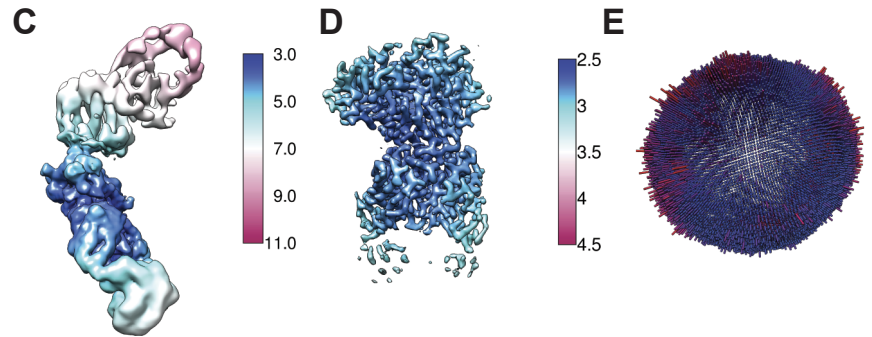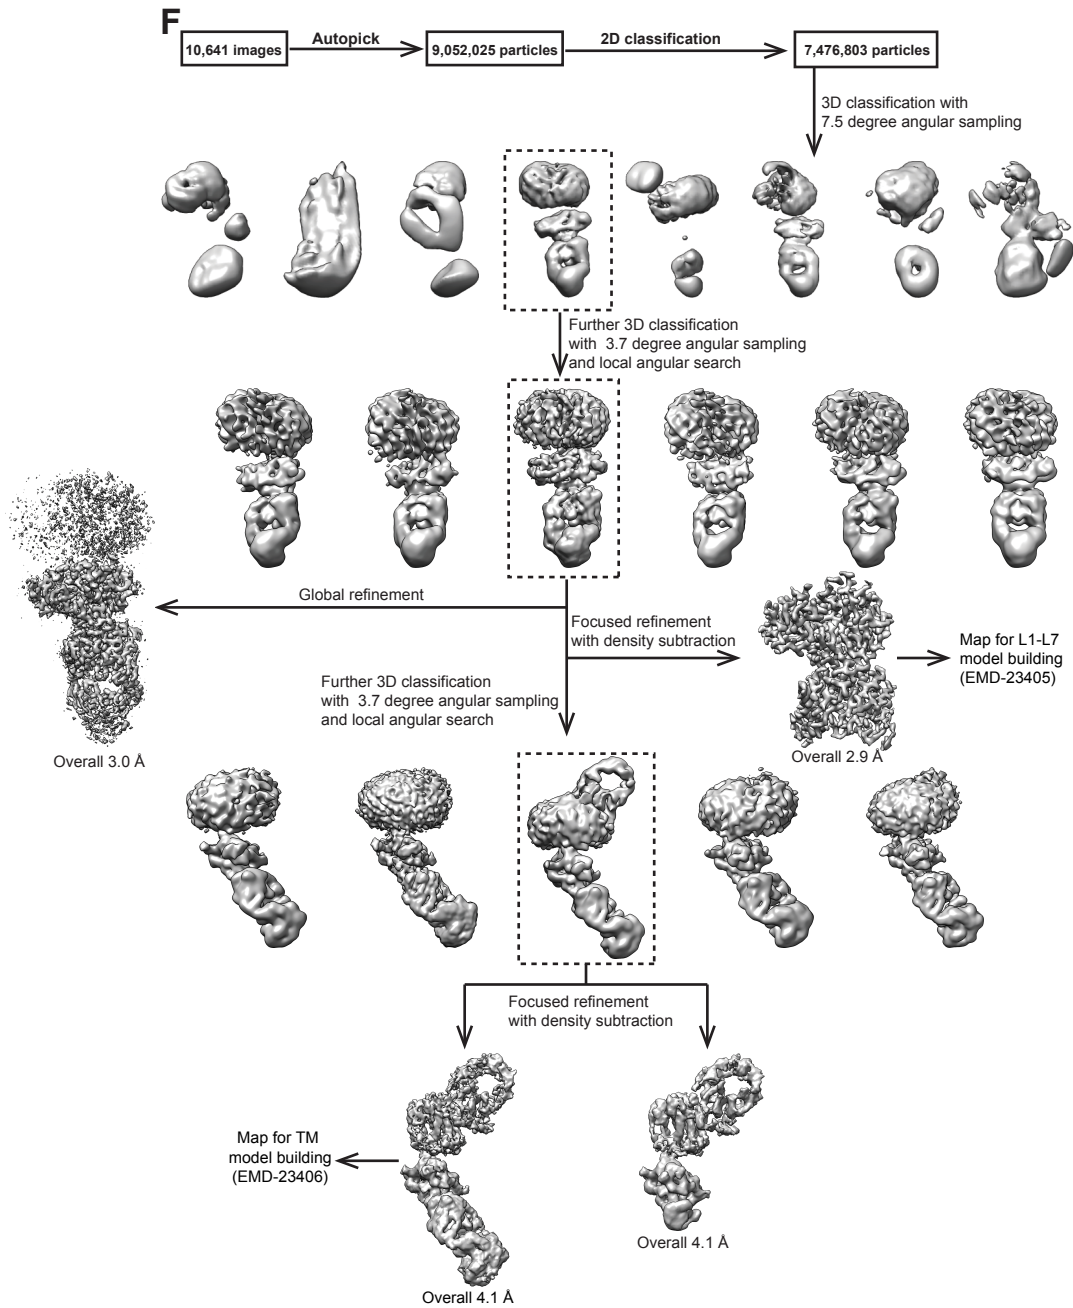

Supplement: NIHMS1707145-supplement-3.pdf [file NIHMS1707145-supplement-3.pdf]

**A**

Loop 1    Loop 7       = residues interrogated by mutagenesis

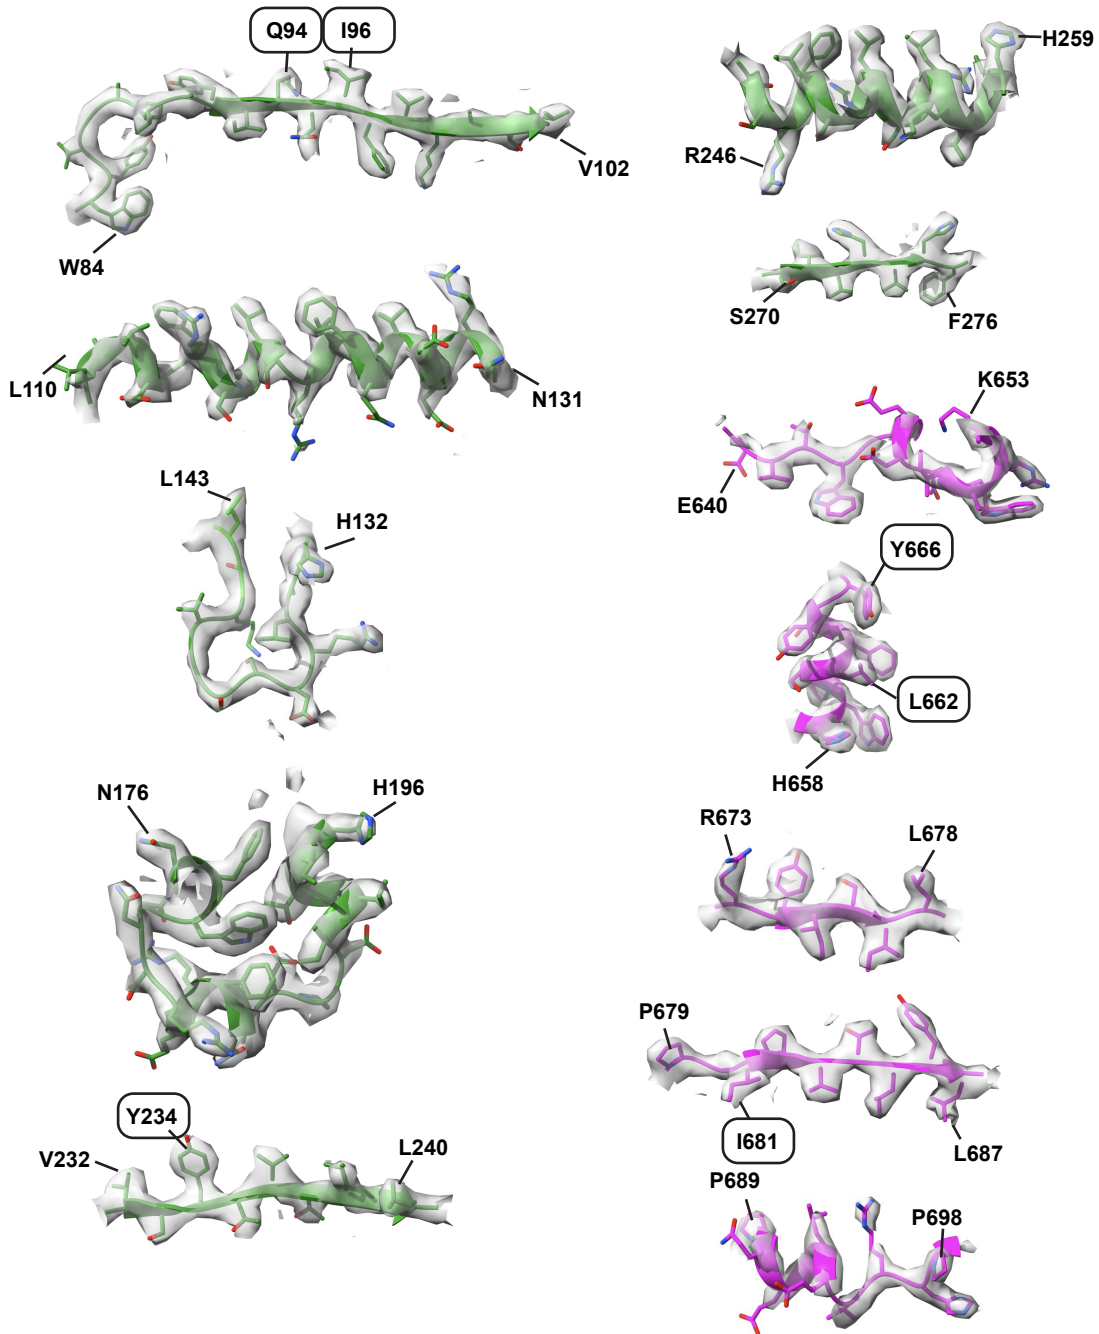**B**    cScap L1-L7 Domain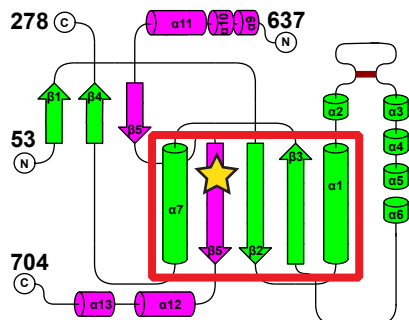

NPC1 MLD

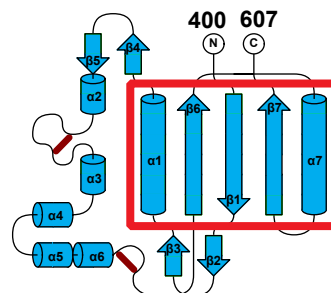

Supplement: NIHMS1707145-supplement-4.pdf [file NIHMS1707145-supplement-4.pdf]

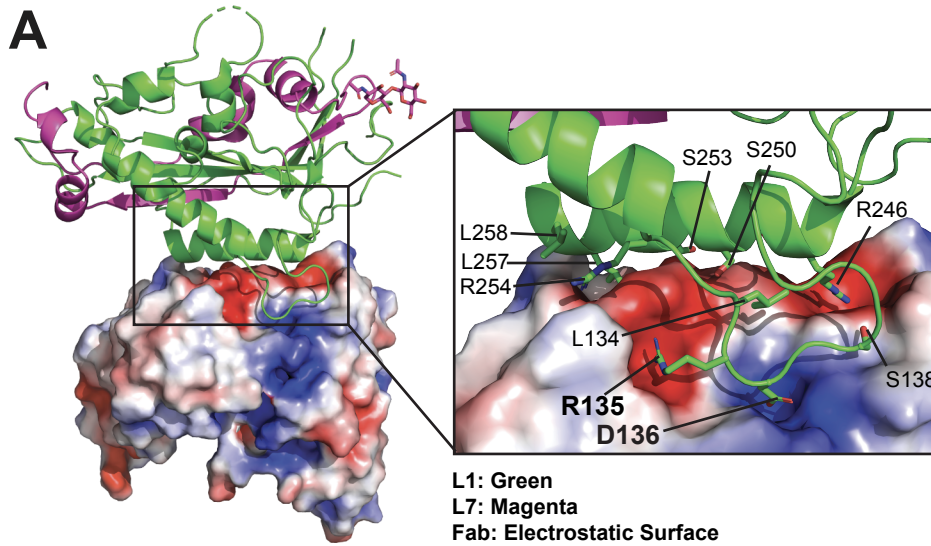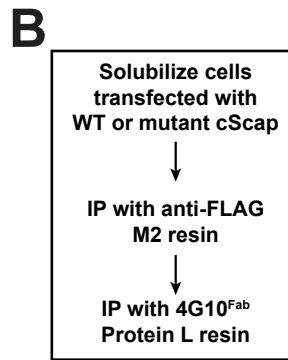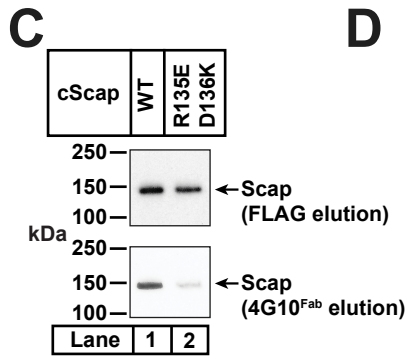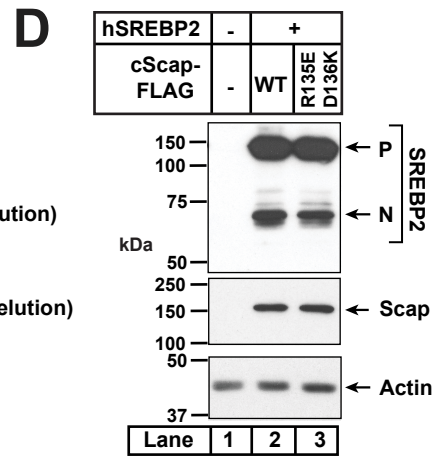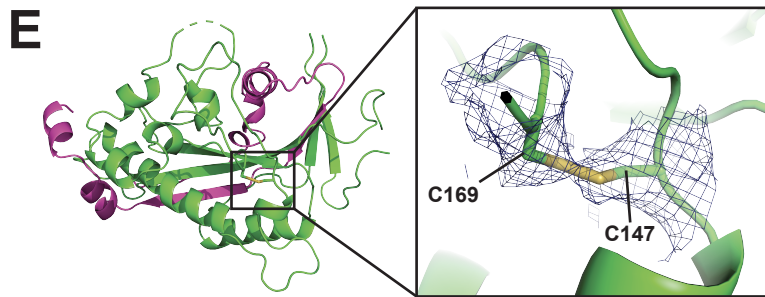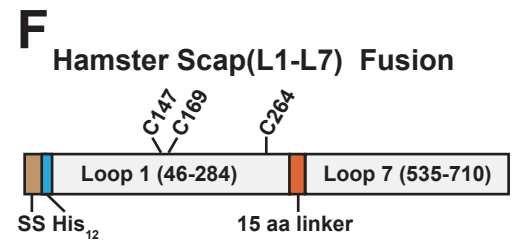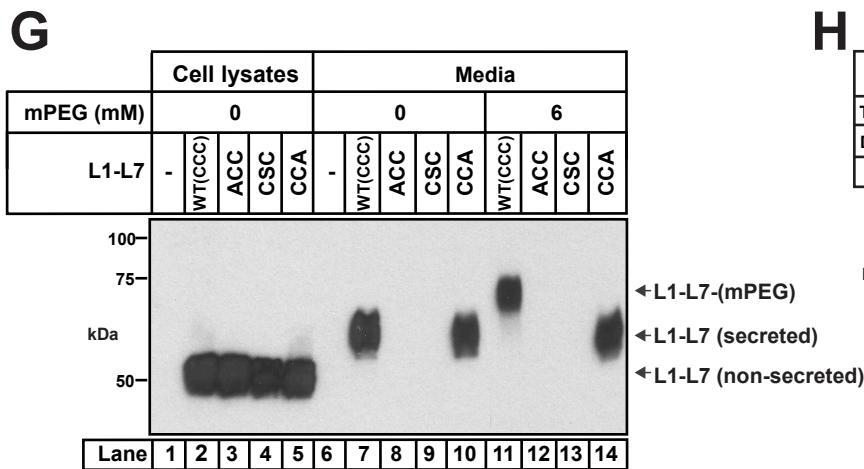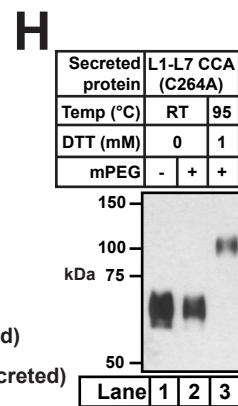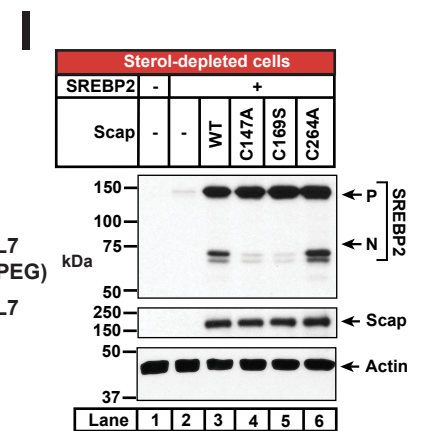

Supplement: NIHMS1707145-supplement-5.pdf [file NIHMS1707145-supplement-5.pdf]

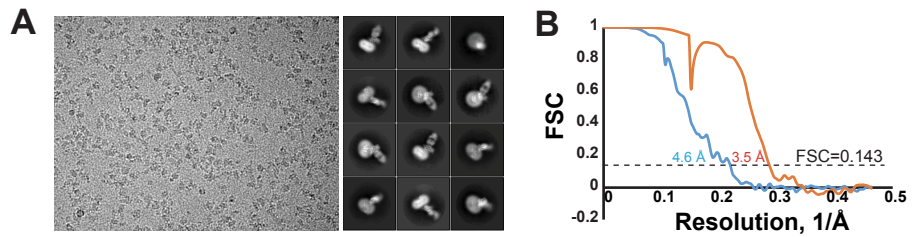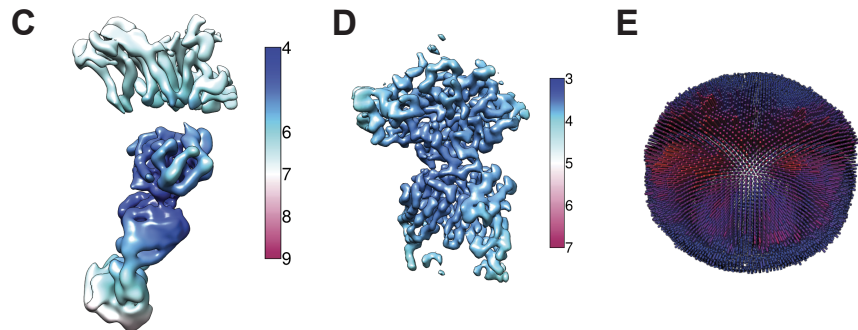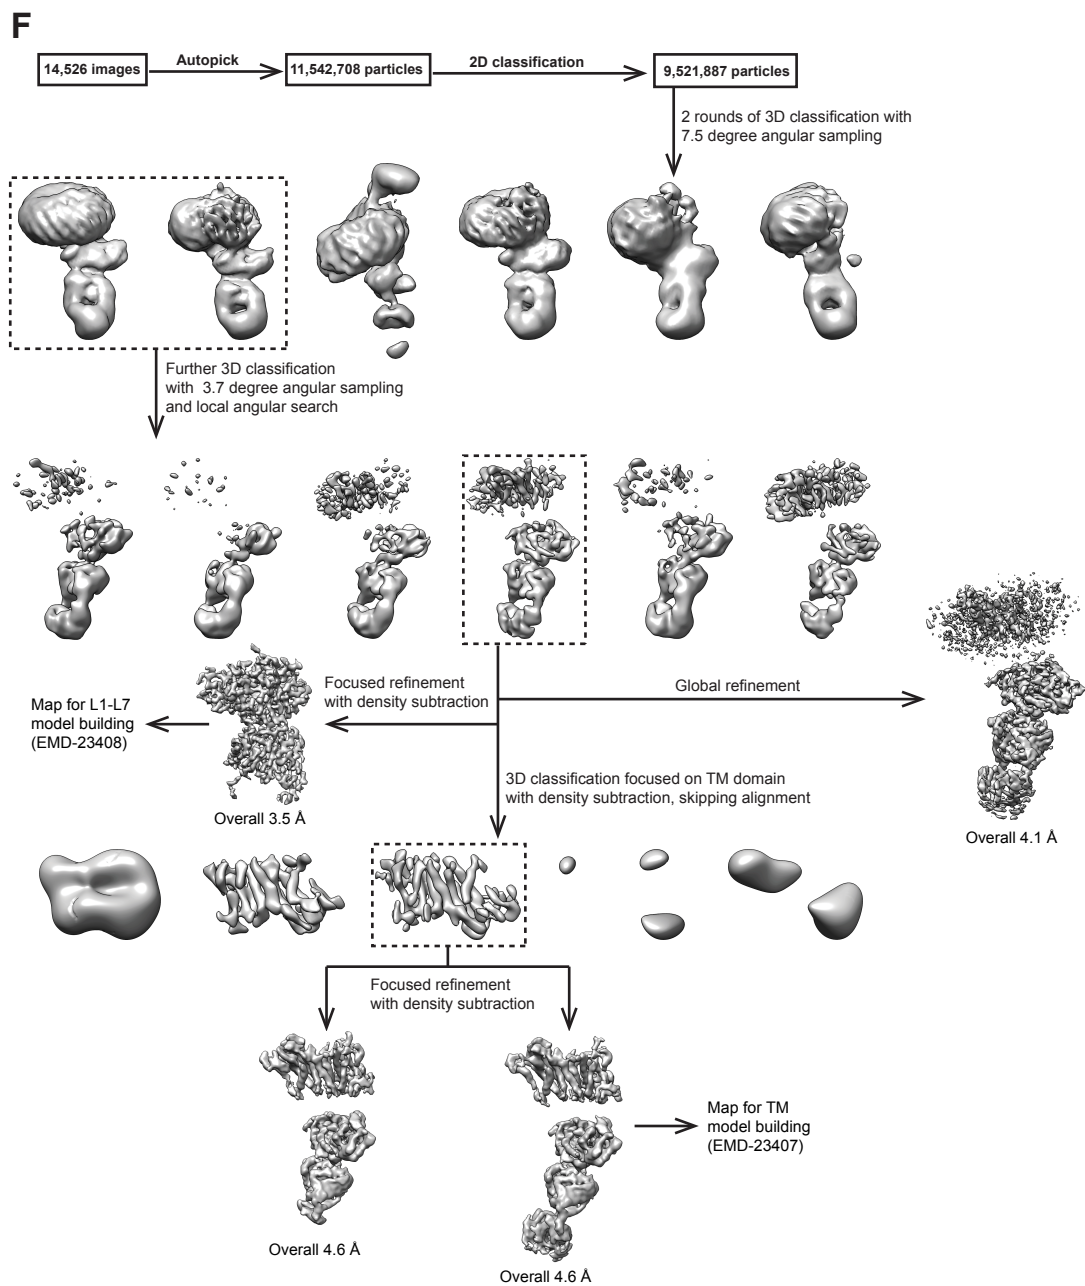

Supplement: NIHMS1707145-supplement-6.pdf [file NIHMS1707145-supplement-6.pdf]

**cScap**

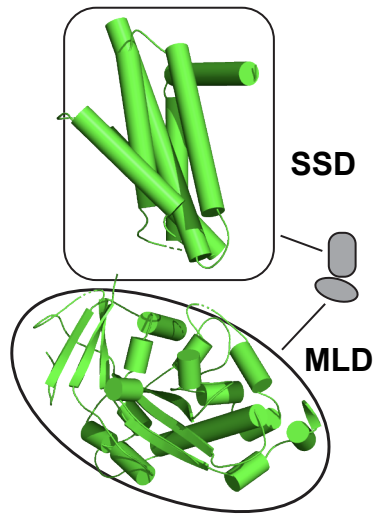

**Scap<sup>D435V</sup>**

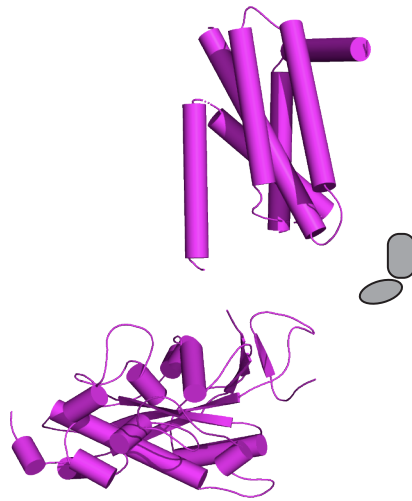

**NPC1 (6W5U)**

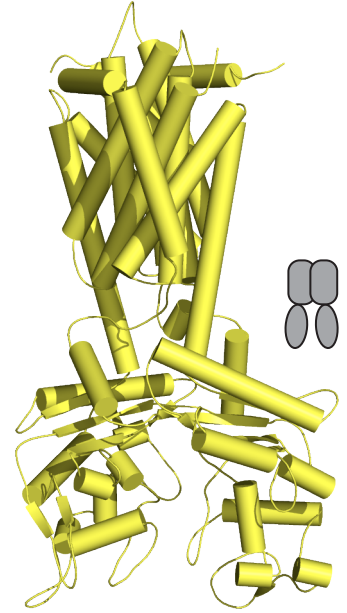

**Patched (6OEU)**

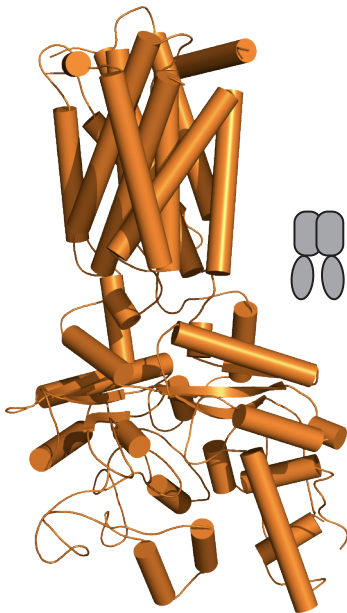

**Dispatched (6TBU)**

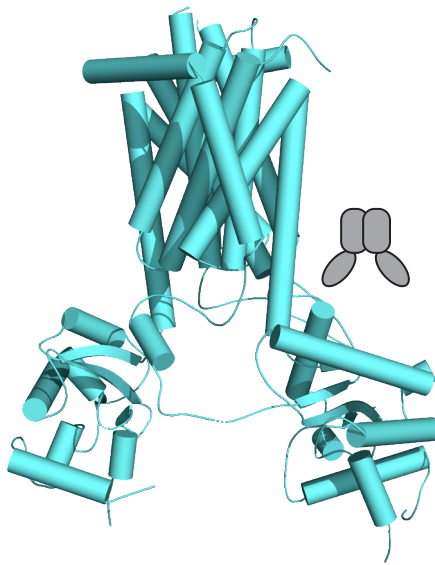

**NPC1-L1 (6V3H)**

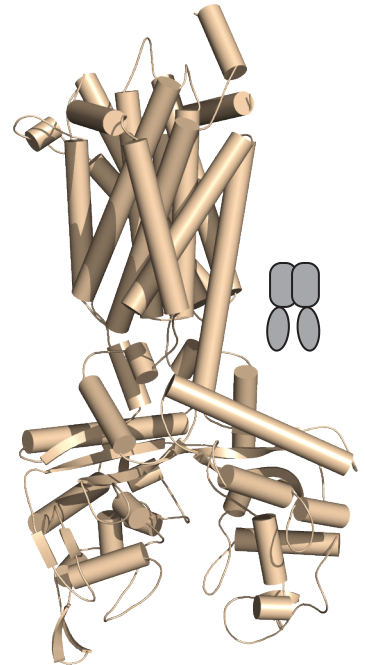

Supplement: NIHMS1707145-supplement-7.pdf [file NIHMS1707145-supplement-7.pdf]
